## CORRECTION

# Correction: Zebrafish *prmt5* arginine methyltransferase is essential for germ cell development

Junji Zhu, Dawei Zhang, Xing Liu, Guangqing Yu, Xiaolian Cai, Chenxi Xu, Fangjing Rong, Gang Ouyang, Jing Wang and Wuhan Xiao

There were errors in *Development* (2019) **146**, dev179572 (doi:10.1242/dev.179572).

In the supplementary information, the primer sequences for *sox9a* in Table S1 were not correct.

### Corrected:

*sox9a* forward primer (5'→3'), GTCTGATGCACCCAGTCCG; *sox9a* reverse primer (5'→3'), TCCTTCTTGAAGTCTCCGAGC.

### Original:

*sox9a* forward primer (5'→3'), AGTCCACACGTTTCCTGATTG; *sox9a* reverse primer (5'→3'), ATCCTGTGGAATTCTGTGACG.

The online supplementary PDF has been updated.

The authors apologise to readers for this error and for any inconvenience it may have caused.
